# Supplementary material
Source: PubMed Central journal article supplement (PMC5567849)
Supplement: NIHMS817749-supplement-Supp_I_2.pdf [file NIHMS817749-supplement-Supp_I_2.pdf]

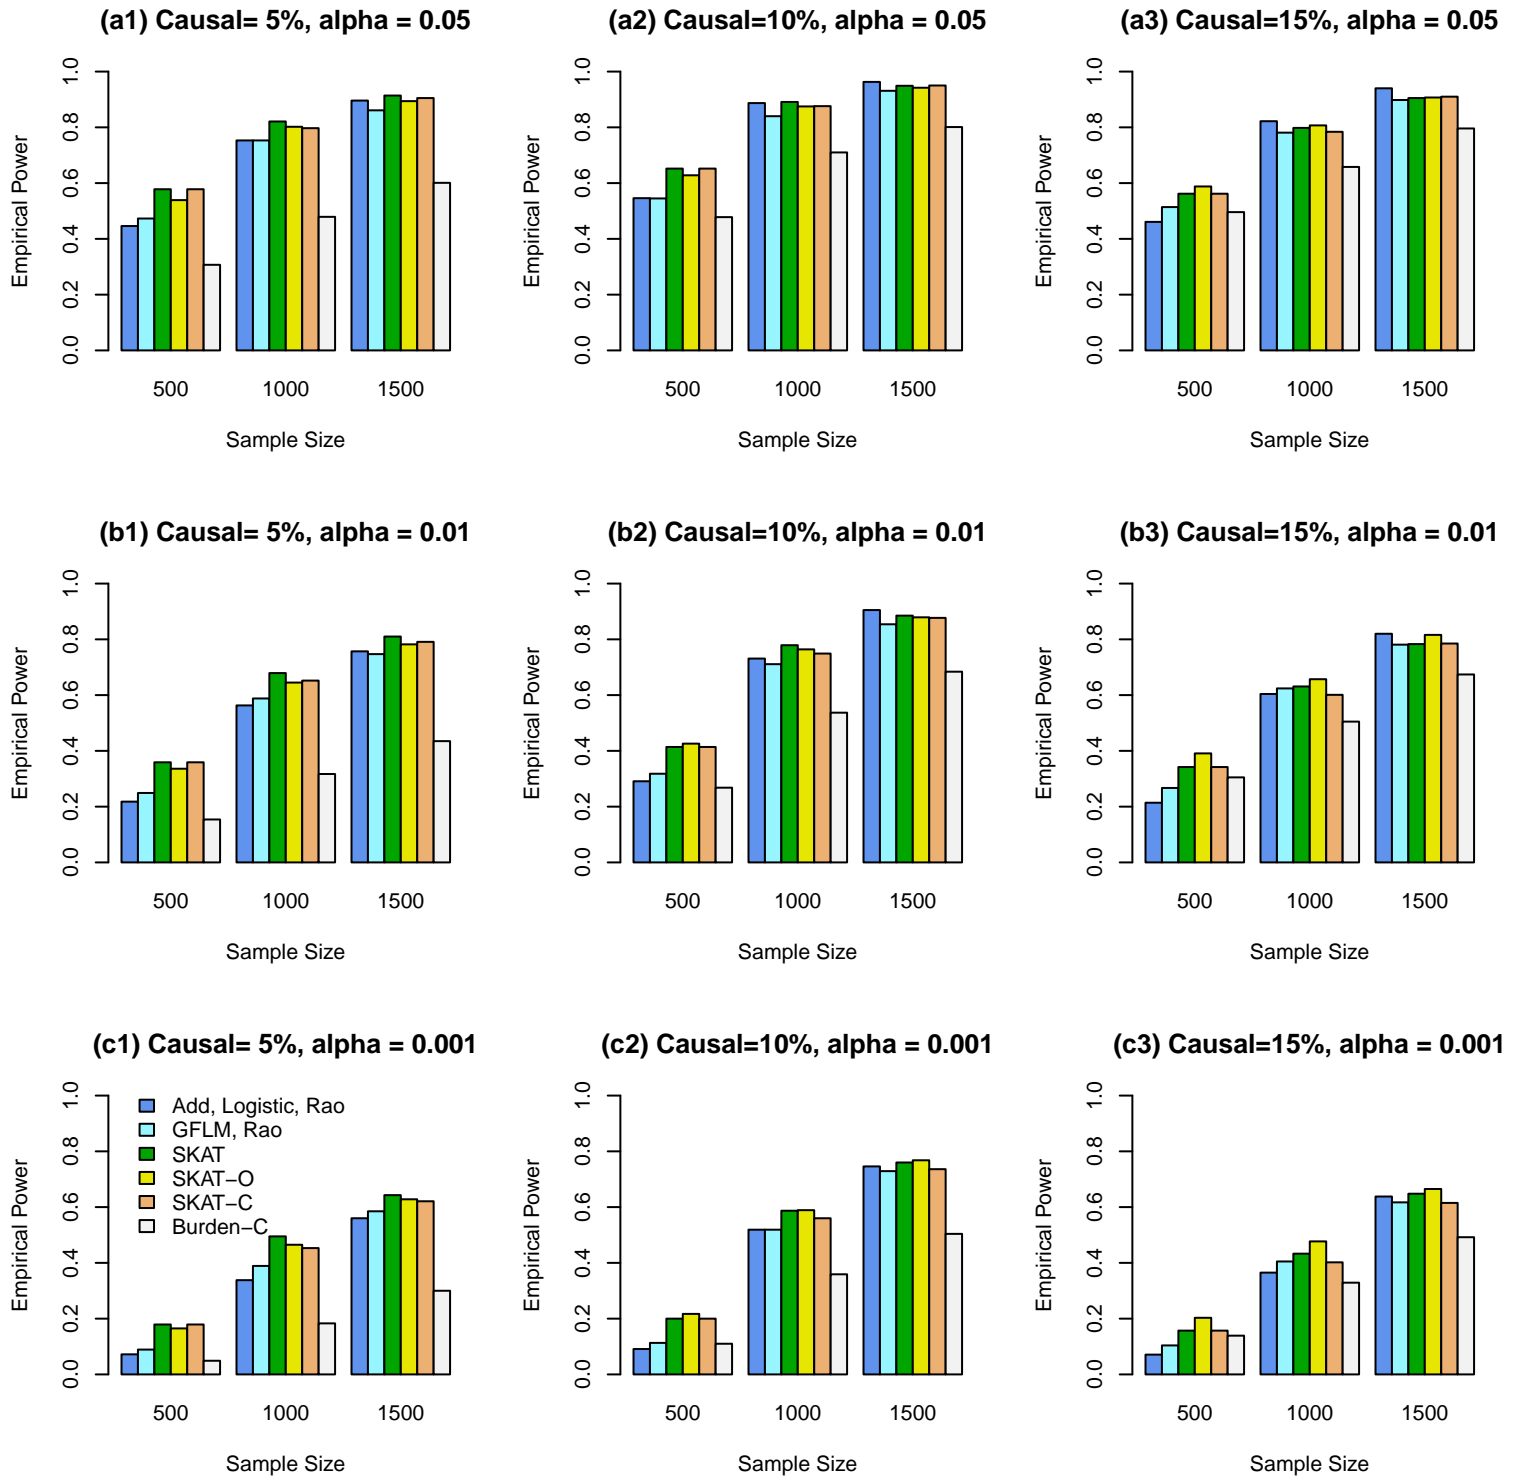

Figure S.16: The Empirical Power of the Rao's Efficient Score Tests of Additive Logistic Regression Model (2) and the GFLM (8) Using B-spline Basis, SKAT, SKAT-O, SKAT-C, and Burden-C, When Causal Variants Were only Rare, the Region Size is 3 kb, the Constant  $k = 1.0$  in Genetic Effect Size  $|\beta_{ij}|$ , and 20%/80% Causal Variants Had Negative/Positive Effects. The order of B-spline basis was 4, and the number of B-spline basis functions was  $K = K_\beta = 10$ .

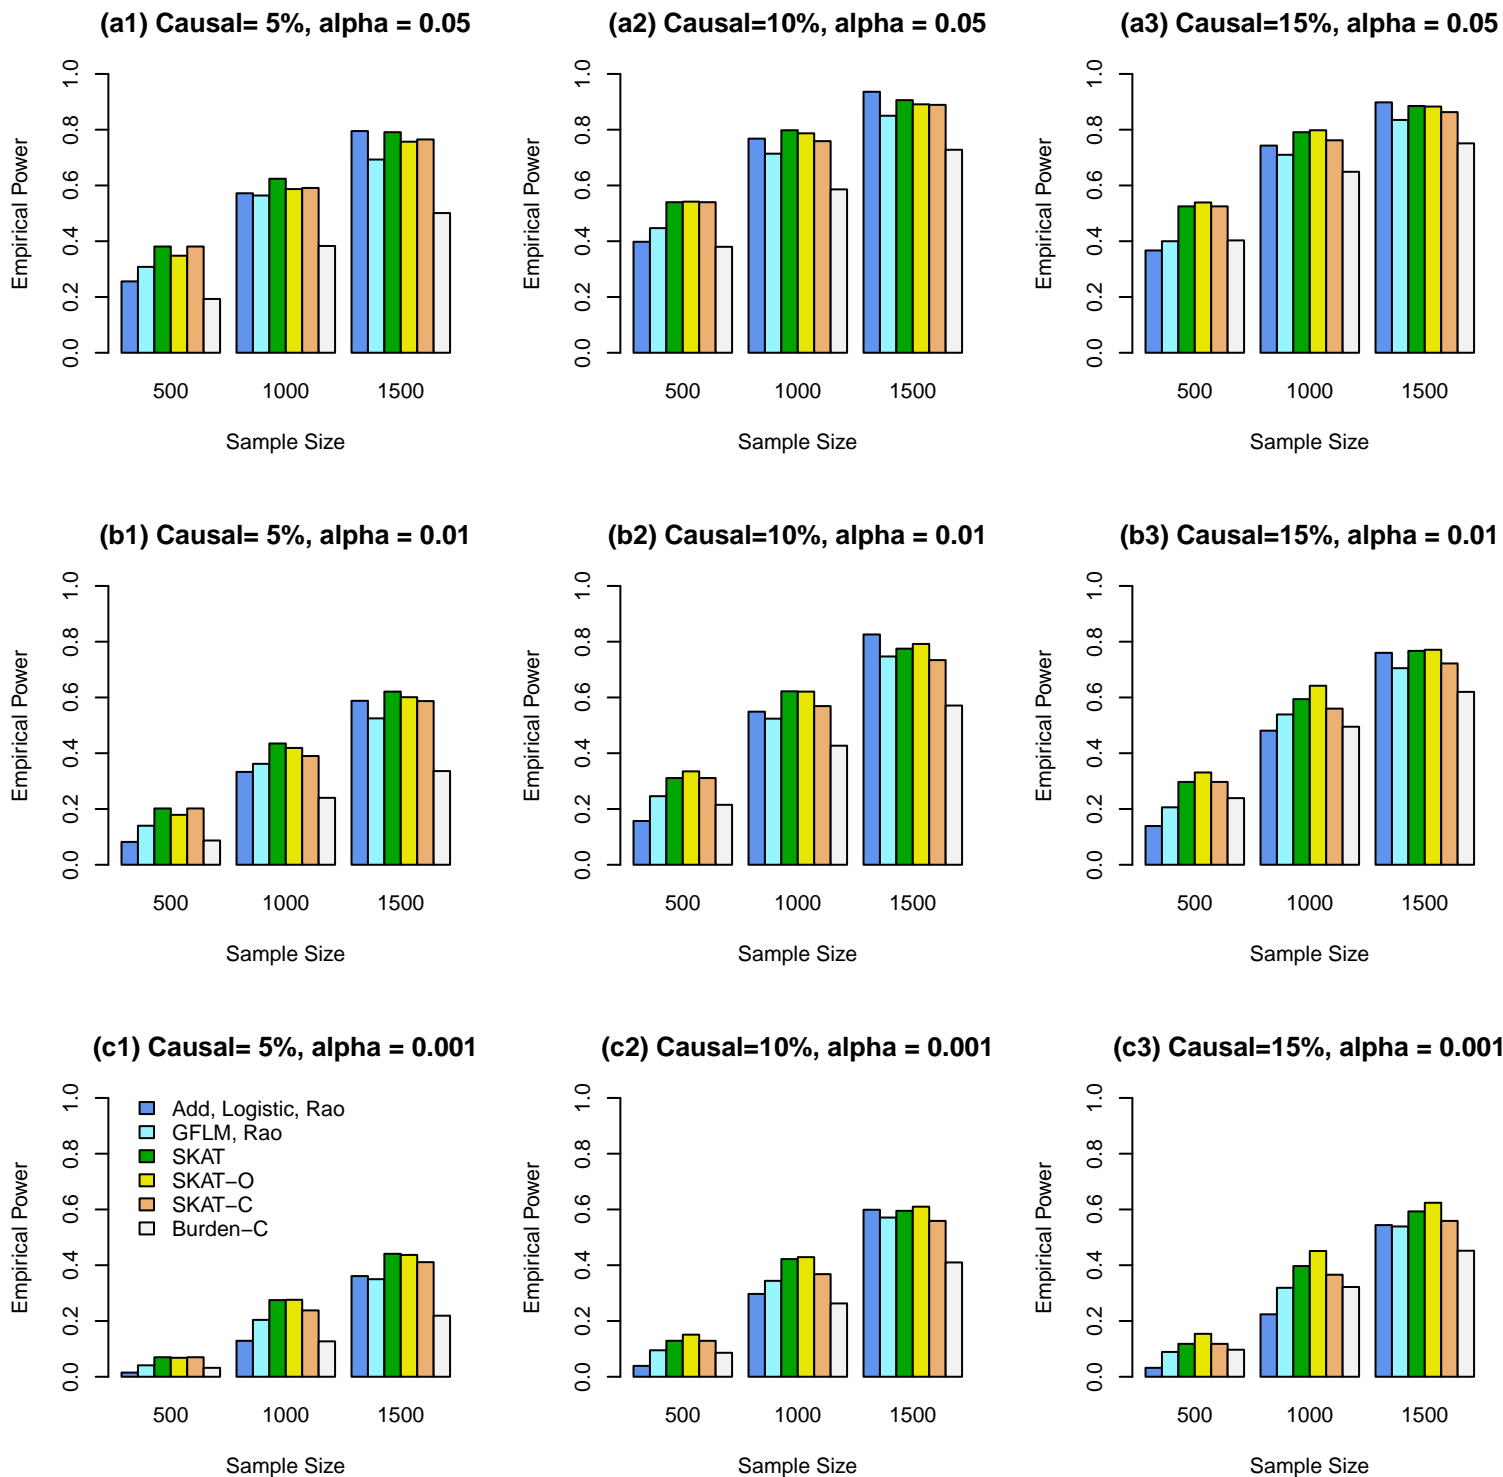

Figure S.17: The Empirical Power of the Rao's Efficient Score Tests of Additive Logistic Regression Model (2) and the GFLM (8) Using B-spline Basis, SKAT, SKAT-O, SKAT-C, and Burden-C, When Causal Variants Were only Rare, the Region Size is 6 kb, the Constant  $k = 1.25$  in Genetic Effect Size  $|\beta_{ij}|$ , and 20%/80% Causal Variants Had Negative/Positive Effects. The order of B-spline basis was 4, and the number of B-spline basis functions was  $K = K_{\beta} = 10$ .

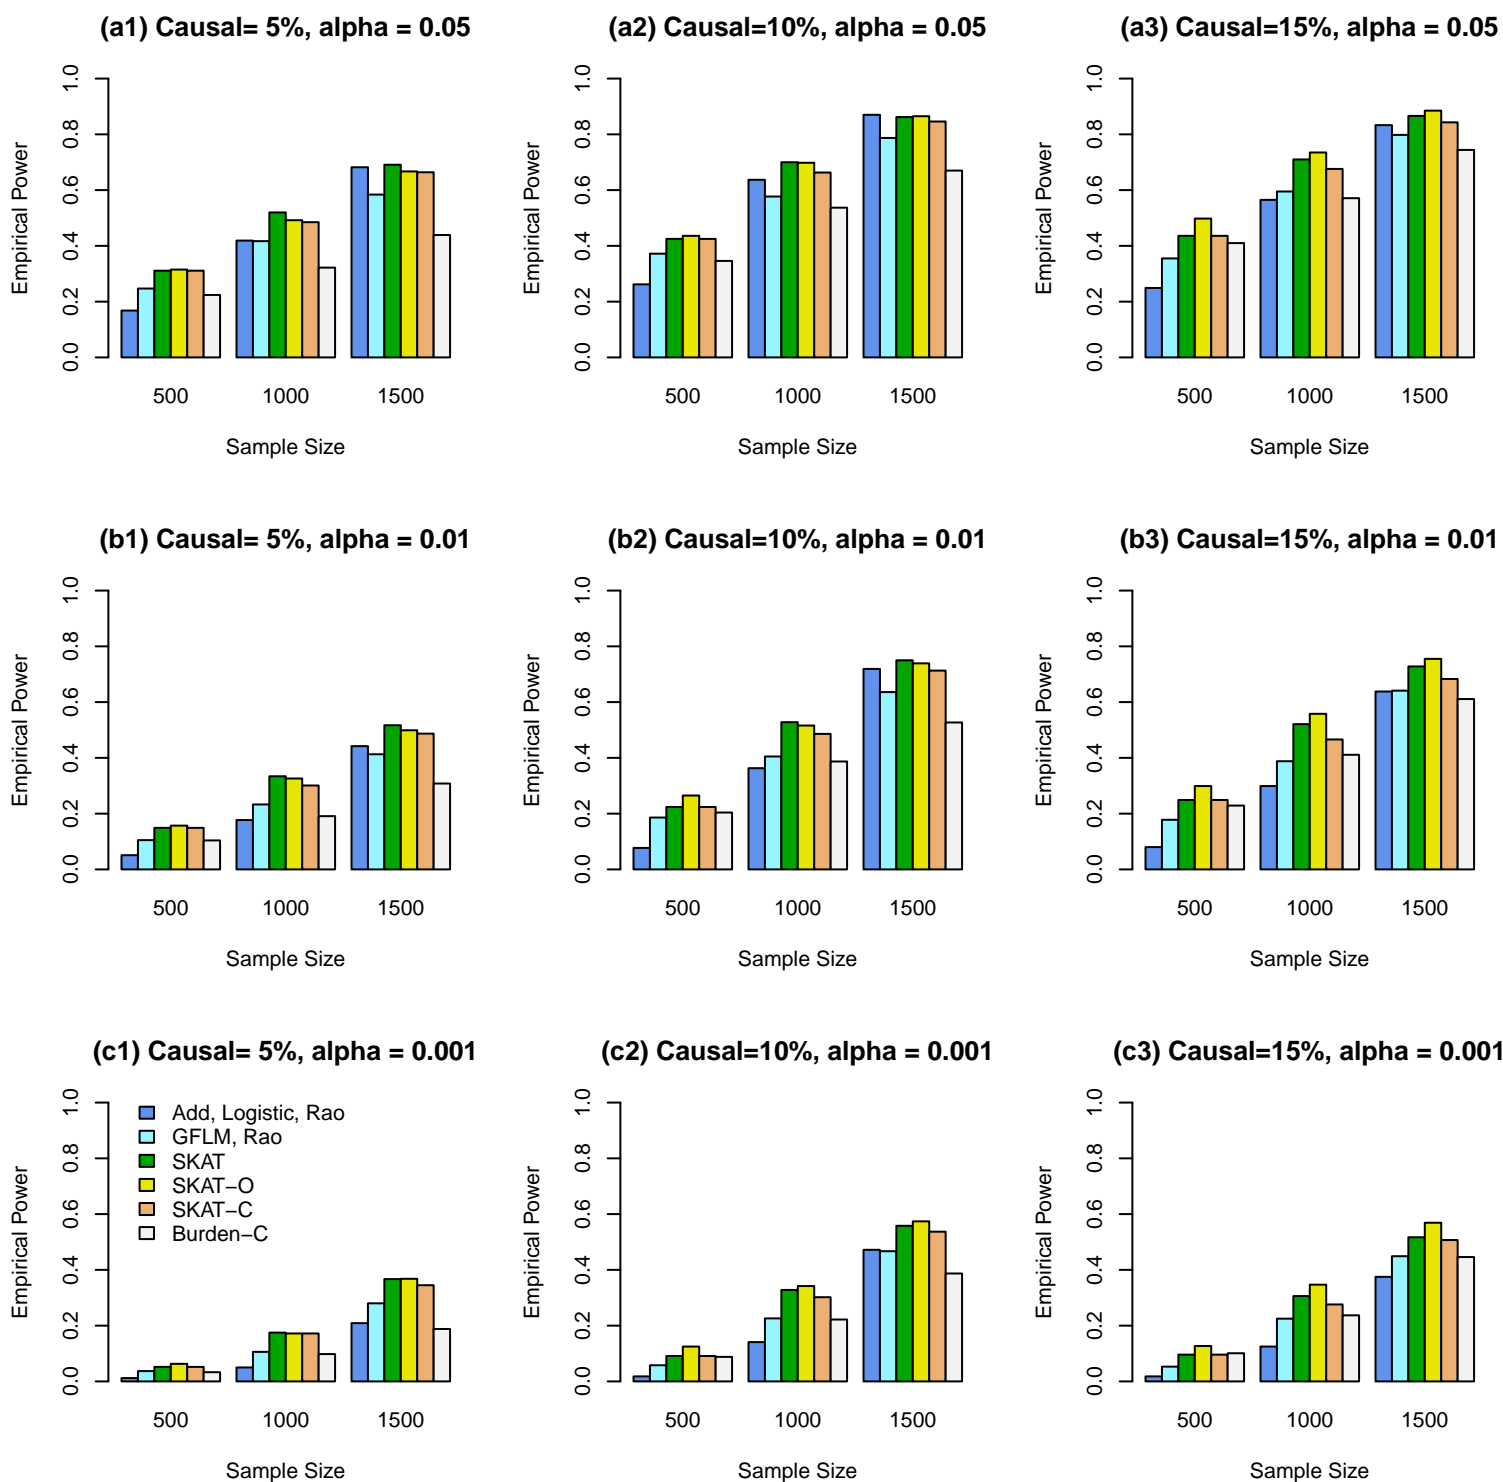

Figure S.18: The Empirical Power of the Rao's Efficient Score Tests of Additive Logistic Regression Model (2) and the GFLM (8) Using B-spline Basis, SKAT, SKAT-O, SKAT-C, and Burden-C, When Causal Variants Were only Rare, the Region Size is 9 kb, the Constant  $k = 1.5$  in Genetic Effect Size  $|\beta_{ij}|$ , and 20%/80% Causal Variants Had Negative/Positive Effects. The order of B-spline basis was 4, and the number of B-spline basis functions was  $K = K_\beta = 10$ .

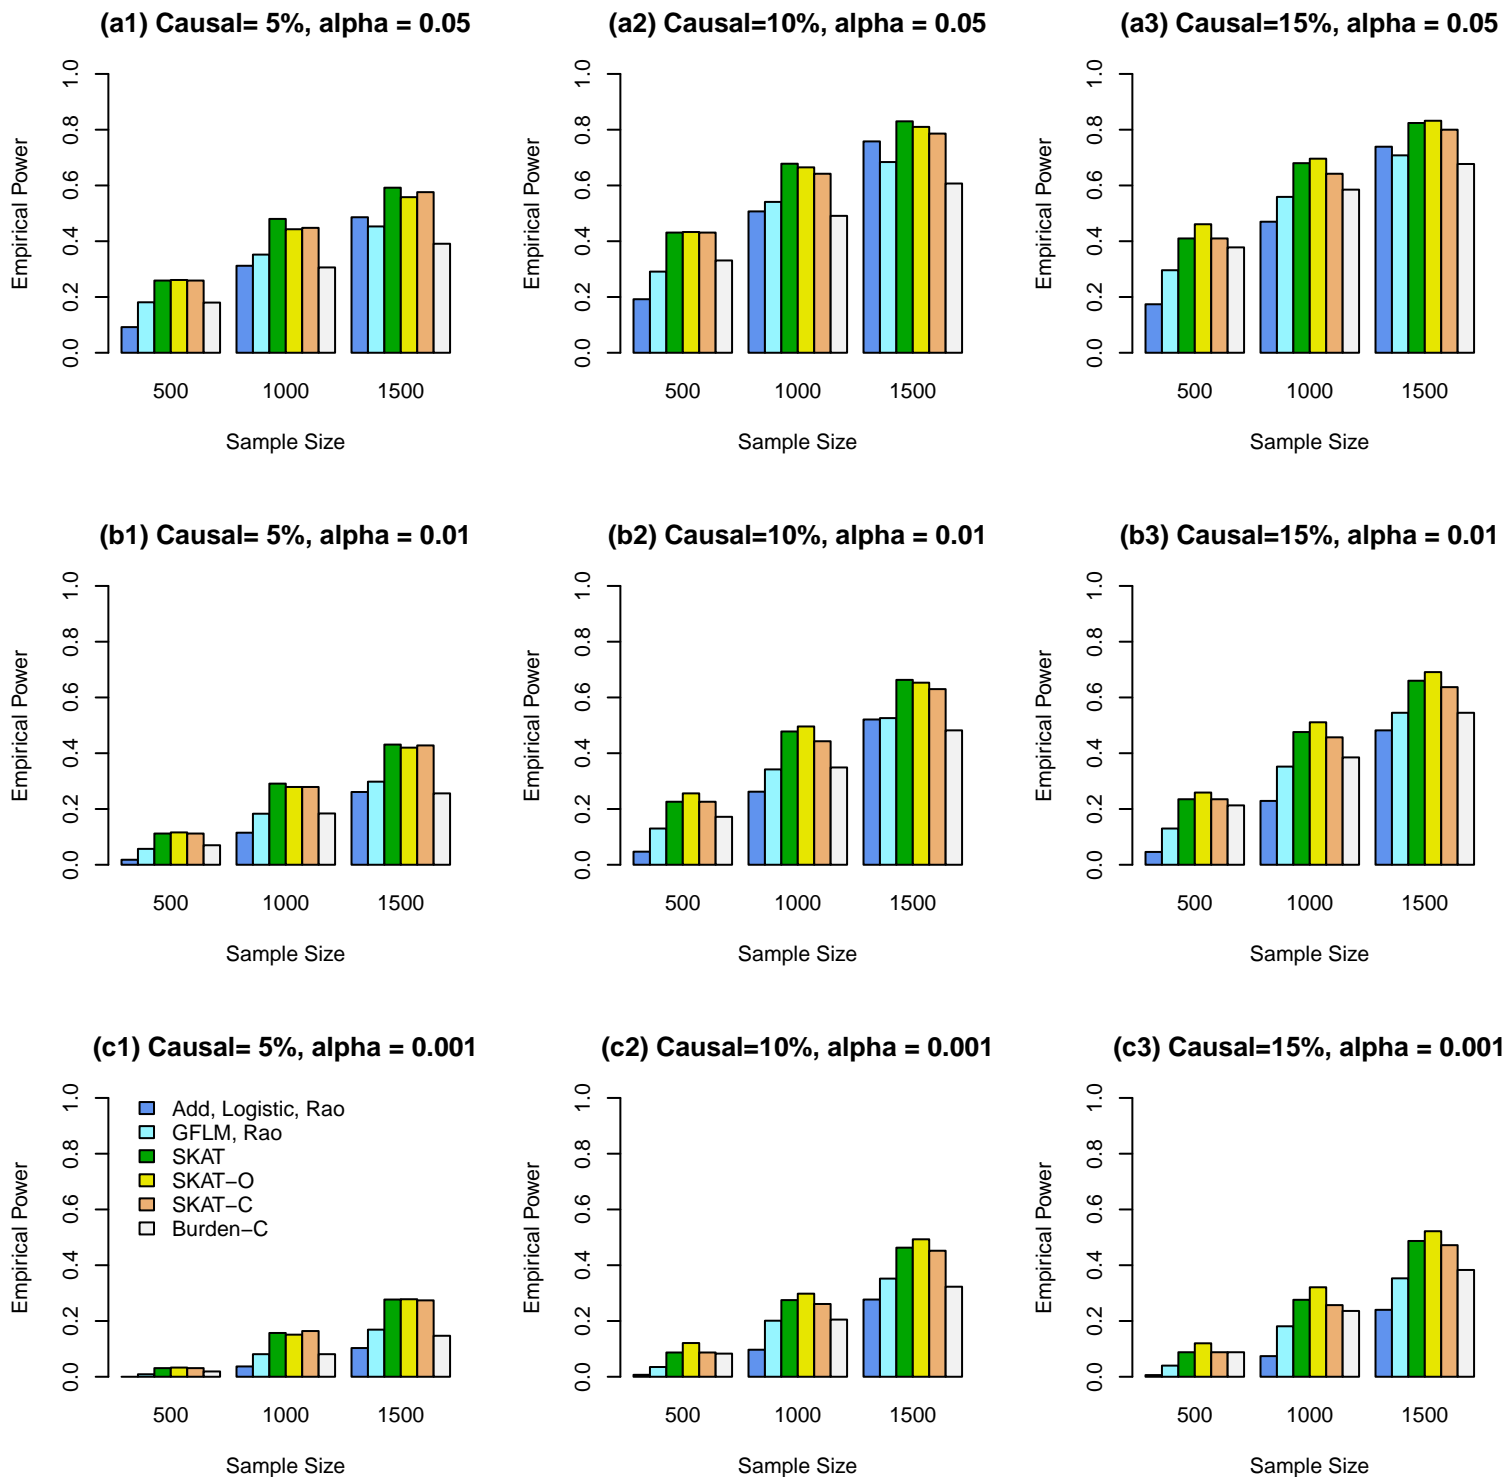

Figure S.19: The Empirical Power of the Rao's Efficient Score Tests of Additive Logistic Regression Model (2) and the GFLM (8) Using B-spline Basis, SKAT, SKAT-O, SKAT-C, and Burden-C, When Causal Variants Were only Rare, the Region Size is 12 kb, the Constant  $k = 1.75$  in Genetic Effect Size  $|\beta_{ij}|$ , and 20%/80% Causal Variants Had Negative/Positive Effects. The order of B-spline basis was 4, and the number of B-spline basis functions was  $K = K_\beta = 10$ .

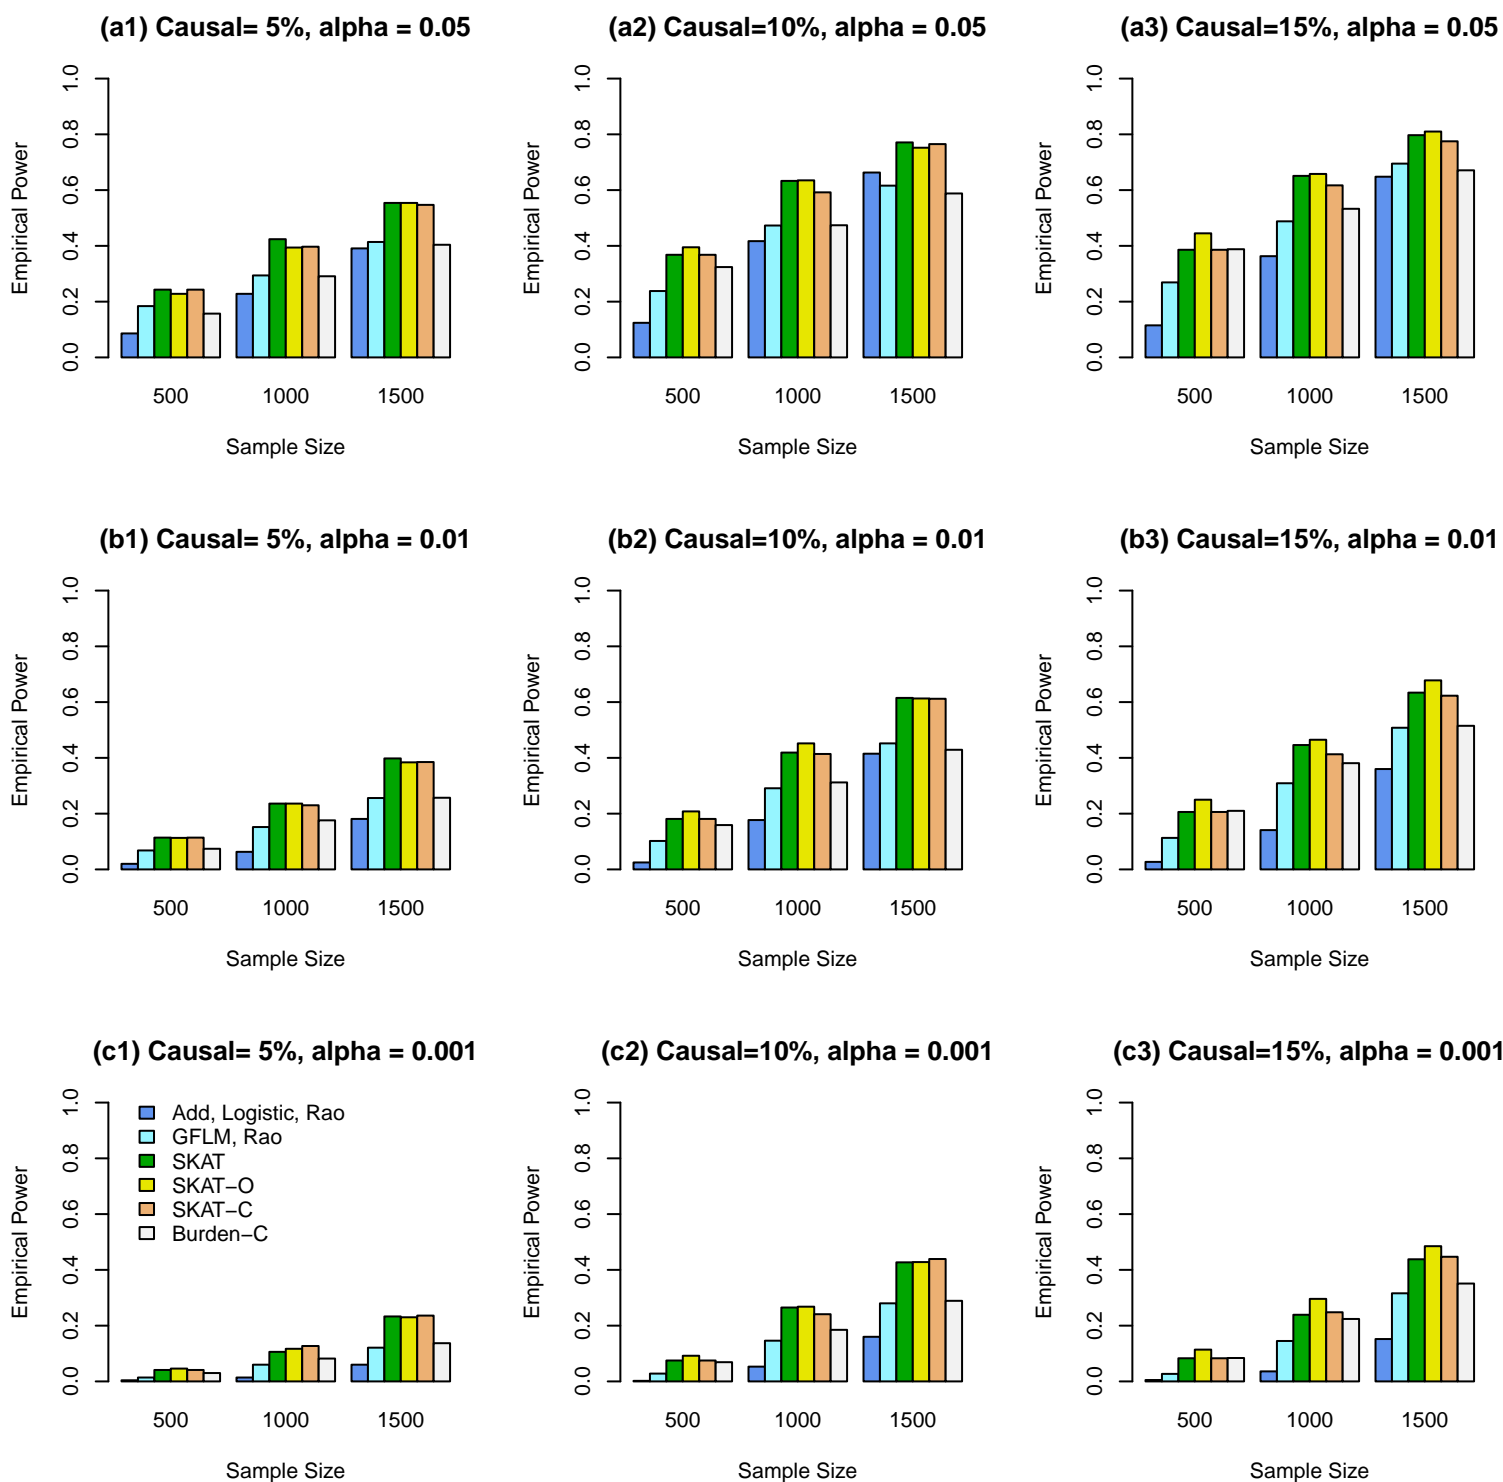

Figure S.20: The Empirical Power of the Rao's Efficient Score Tests of Additive Logistic Regression Model (2) and the GFLM (8) Using B-spline Basis, SKAT, SKAT-O, SKAT-C, and Burden-C, When Causal Variants Were only Rare, the Region Size is 15 kb, the Constant  $k = 2.0$  in Genetic Effect Size  $|\beta_{ij}|$ , and 20%/80% Causal Variants Had Negative/Positive Effects. The order of B-spline basis was 4, and the number of B-spline basis functions was  $K = K_\beta = 10$ .
